# Supplementary material
Source: publisher figshare collection journal article supplement (https://brill.figshare.com/articles/dataset/_/16621774)
Supplement: Supplementary file 1 [file 1]

## Short Note

# The distribution and biogeography of slow worms (*Anguis*, Squamata) across the Western Palearctic, with an emphasis on secondary contact zones

Daniel Jablonski<sup>1,\*.a</sup>, Neftalí Sillero<sup>2,b</sup>, Oleksandra Oskyrko<sup>3,c</sup>, Adriana Bellati<sup>4</sup>, Andris Čeirāns<sup>5,d</sup>, Marc Cheylan<sup>6,e</sup>, Dan Cogălniceanu<sup>7,f</sup>, Jelka Crnobrnja-Isailović<sup>8,9,g</sup>, Pierre-André Crochet<sup>10</sup>, Angelica Crottini<sup>11,h</sup>, Igor Doronin<sup>12,i</sup>, Georg Džukić<sup>9</sup>, Philippe Geniez<sup>6</sup>, Çetin Ilgaz<sup>13,14</sup>, Ruben Iosif<sup>7</sup>, David Jandzik<sup>1</sup>, Dušan Jelić<sup>15,j</sup>, Spartak Litvinchuk<sup>16,k</sup>, Katarina Ljubisavljević<sup>9,l</sup>, Petros Lymberakis<sup>17,m</sup>, Peter Mikulíček<sup>1.n</sup>, Edvárd Mizsei<sup>18</sup>, Jiří Moravec<sup>19,o</sup>, Bartłomiej Najbar<sup>20,p</sup>, Maciej Pabijan<sup>21,q</sup>, Mihails Pupins<sup>5,r</sup>, Patricia Sourrouille<sup>10</sup>, Ilias Strachinis<sup>22,s</sup>, Márton Szabolcs<sup>23,t</sup>, Evanthia Thanou<sup>24,u</sup>, Elias Tzoras<sup>25</sup>, Vladislav Vergilov<sup>26,v</sup>, Judit Vörös<sup>27.w</sup>, Václav Gvoždík<sup>19,28,\*,x</sup>

1 - Department of Zoology, Comenius University in Bratislava, Ilkovičova 6, Mlynská dolina, 842 15

Bratislava, Slovakia

2 - CIGGE Centro de Investigação em Ciências Geo-Espaciais, Faculdade de Ciências da Universidade do Porto

(FCUP), Alameda do Monte da Virgem, 4430-146, Vila Nova de Gaia, Portugal

3 - Department of Zoology, Faculty of Science, Charles University, Viničná 7, 128 44 Prague, Czech Republic

4 - Department of Ecological and Biological Sciences, Tuscia University, Largo dell'università snc, 01100

Viterbo, Italy

5 - Daugavpils University, Department of Ecology, Daugavpils, Latvia

- 6 - CEFE, Univ. Montpellier, CNRS, EPHE-PSL University, IRD, Biogeography and Ecology of Vertebrates, Montpellier, France
- 7 - University Ovidius Constanța, Faculty of Natural Sciences and Agricultural Sciences, Al. Universității 1, 900470 Constanța, Romania
- 8 - Department of Biology and Ecology, Faculty of Sciences and Mathematics, University of Niš, Višegradska 33, 18000 Niš, Serbia
- 9 - Department of Evolutionary Biology, Institute for Biological Research “Siniša Stanković” – National Institute of Republic of Serbia, University of Belgrade, Despota Stefana 142, 11060 Belgrade, Serbia
- 10 - CEFE, CNRS, Univ. Montpellier, EPHE, IRD, Montpellier, France
- 11 - CIBIO, Research Centre in Biodiversity and Genetic Resources, InBIO, Universidade do Porto, Campus Agrário de Vairão, Rua Padre Armando Quintas, No 7, 4485-661 Vairão, Portugal
- 12 - Zoological Institute of the Russian Academy of Sciences, Universitetskaya Emb. 1, 199034 Saint Petersburg, Russia
- 13 - Dokuz Eylül University, Faculty of Science, Department of Biology, Buca-İzmir, Turkey
- 14 - Dokuz Eylül University, Fauna and Flora Research Centre, 35610, Buca-İzmir, Turkey
- 15 - Croatian Institute for Biodiversity, BIOTA Ltd, Zagreb, Croatia
- 16 - Institute of Cytology, Russian Academy of Sciences, Tikhoretsky pr. 4, 194064 Saint Petersburg, Russia
- 17 - Natural History Museum of Crete, School of Sciences and Engineering, University of Crete, Knossos Ave. 71409 Irakleio, Greece
- 18 - Department of Ecology, University of Debrecen, Debrecen, Hungary
- 19 - National Museum, Department of Zoology, Prague, Czech Republic
- 20 - University of Zielona Góra, Faculty of Biological Sciences, Department of Zoology, Prof. Z. Szafrana 1, 65-616 Zielona Góra, Poland
- 21 - Institute of Zoology and Biomedical Research, Jagiellonian University, ul. Gronostajowa 9, 30-387, Kraków, Poland
- 22 - Department of Genetics, Development and Molecular Biology, School of Biology, Faculty of Natural Sciences, Aristotle University of Thessaloniki, Greece
- 23 - Department of Tisza River Research, Institute of Aquatic Ecology, Centre for Ecological Research, Bem tér 18/C, 4026, Debrecen, Hungary

24 - Section of Animal Biology, Department of Biology, School of Natural Sciences, University of Patras, Rion  
University Campus, GR-26500 Patras, Greece

25 - Patras, 26442 Achaia, Greece

26 - National Museum of Natural History at the Bulgarian Academy of Sciences, 1 Tsar Osvoboditel Blvd.,  
1000 Sofia, Bulgaria

27 - Department of Zoology, Hungarian Natural History Museum, Baross u. 13., 1088, Budapest, Hungary

28 - Institute of Vertebrate Biology of the Czech Academy of Sciences, Brno, Czech Republic

\*Corresponding author; e-mail: daniel.jablonski@uniba.sk; vaclav.gvozdik@gmail.com

<sup>a</sup>ORCID: 0000-0002-5394-0114

<sup>b</sup>ORCID: 0000-0002-3490-3780

<sup>c</sup>ORCID: 0000-0003-0092-4193

<sup>d</sup>ORCID: 0000-0002-6035-8704

<sup>e</sup>ORCID: 0000-0001-7594-571X

<sup>f</sup>ORCID: 0000-0003-2959-014X

<sup>g</sup>ORCID: 0000-0003-4292-5995

<sup>h</sup>ORCID: 0000-0002-8505-3050

<sup>i</sup>ORCID: 0000-0003-1000-3144

<sup>j</sup>ORCID: 0000-0003-2790-1522

<sup>k</sup>ORCID: 0000-0001-7447-6691

<sup>l</sup>ORCID: 0000-0003-4389-2355

<sup>m</sup>ORCID: 0000-0002-5067-9600

<sup>n</sup>ORCID: 0000-0002-4927-493X

<sup>o</sup>ORCID: 0000-0003-4114-7466

<sup>p</sup>ORCID: 0000-0003-0963-8409

<sup>q</sup>ORCID: 0000-0001-5557-2338

<sup>r</sup>ORCID: 0000-0002-5445-9250

<sup>s</sup>ORCID: 0000-0001-9944-4522

<sup>t</sup>ORCID: 0000-0001-9375-9937

<sup>u</sup>ORCID: 0000-0002-5008-6012

<sup>v</sup>ORCID: 0000-0002-7464-2263

<sup>w</sup>ORCID: 0000-0001-9707-1443

<sup>x</sup>ORCID: 0000-0002-4398-4076

## **Supplementary material**
